# Supplementary material for: A H2S and I− dual-responsive supramolecular polymer constructed via pillar[5]arene-based host–guest interactions and metal coordination
Source: Royal Society of Chemistry journal article supplement (doi:10.1039/c7qo01165b), 2018-01-01
Supplement: c7qo01165b1.pdf [file c7qo01165b1.pdf]

## A H<sub>2</sub>S and I<sup>-</sup> dual-responsive supramolecular polymer constructed by pillar[5]arene-based host-guest interaction and metal coordination

Pi Wang,<sup>\*a</sup> Jiao Ma,<sup>a</sup> and Danyu Xia<sup>\*b</sup>

<sup>a</sup> Ministry of Education Key Laboratory of Interface Science and Engineering in Advanced Materials, Research Center of Advanced Materials Science and Technology, Taiyuan University of Technology, Taiyuan 030024, China; E-mail: wangpi@tyut.edu.cn

<sup>b</sup> Scientific Instrument Center, Shanxi University, Taiyuan 030006, P. R. China; E-mail: danyuxia@sxu.edu.cn

### Electronic Supplementary Information (11 pages)

|                                                                                                                                                    |     |
|----------------------------------------------------------------------------------------------------------------------------------------------------|-----|
| 1. Materials and Methods                                                                                                                           | S2  |
| 2. Syntheses of <b>H</b> and <b>G</b>                                                                                                              | S3  |
| 3. Partial <sup>1</sup> H NMR spectra of the formation of the pillar[5]arene-based dimer and host-guest interaction between the dimer and <b>G</b> | S9  |
| 4. DLS results                                                                                                                                     | S10 |
| 5. Reversible stimuli-responsive supramolecular polymer to monomers transformation investigated by viscosity measurements                          | S10 |
| 6. AFM image of the fibers drawn from the supramolecular polymer                                                                                   | S11 |
| References                                                                                                                                         | S12 |

### *1. Materials and methods*

All reagents were commercially available and used as supplied without further purification. Compounds **1**,<sup>S1</sup> **2**<sup>S2</sup> and **4**<sup>S3</sup> were prepared according to published procedures. H<sub>2</sub>S gas was prepared by a simple chemistry reactor and was permitted to pass an airtight conical flask containing a test tube in which the supramolecular polymer was placed previously.<sup>S4</sup> NMR spectra were recorded with a Bruker Avance DMX 500 spectrophotometer or a Bruker Avance DMX 400 spectrophotometer. Low-resolution electrospray ionization mass spectra were recorded with a Bruker Esquire 3000 Plus spectrometer. High-resolution mass spectrometry experiments were performed with a Bruker 7-Tesla FT-ICR mass spectrometer equipped with an electrospray source (Billerica, MA, USA). The melting points were collected on a SHPSIC WRS-2 automatic melting point apparatus. Viscosity measurements were carried out with a Cannon-Ubbelohde semi-micro dilution viscometer at 25 °C in chloroform. Scanning electron microscopy investigations were carried out on a JEOL 6390LV instrument or an Ultra-55 instrument. Dynamic light scattering was carried out on a Malvern Nanosizer S instrument at room temperature.

## 2. Syntheses of **H** and **G**

### 2.1. Synthesis of **H**

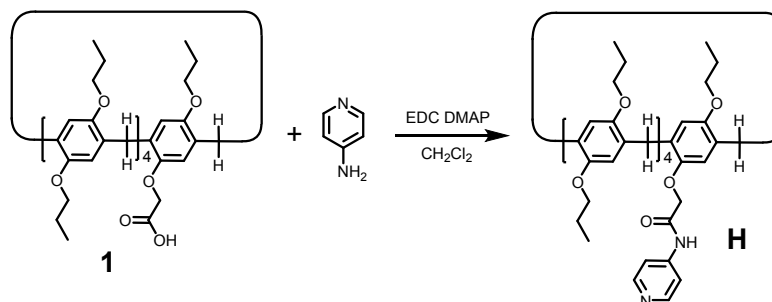

**Scheme S1** Synthetic route to **H**

A solution of **1** (2.00 g, 1.91 mmol), 4-aminopyridine (0.360 g, 3.82 mmol) and catalytic amounts 4-dimethylaminopyridine (DMAP) in dichloromethane (50 mL) was stirred for 10 minutes at 0 °C. Then EDC (1.10 g, 5.73 mmol) was added. The reaction mixture was stirred for 24 h at room temperature, filtered, and concentrated to give a crude product, which was purified by flash column chromatography (methanol/dichloromethane, 1:20 v/v) to afford **H** as a white solid (0.990 g, 44%). Mp: 74.0–75.4 °C. The  $^1\text{H}$  NMR spectrum of **H** is shown in Fig. S1.  $^1\text{H}$  NMR (400 MHz,  $\text{CDCl}_3$ )  $\delta$  8.69 (s, 1H), 8.53 (d,  $J = 6.0$  Hz, 2H), 7.52 (d,  $J = 6.4$  Hz, 2H), 6.82 (m, 10H), 6.72 (s, 1H), 6.63 (s, 1H), 5.18 (s, 2H), 4.50 (s, 2H), 3.87–3.67 (m, 28H), 3.60 (t,  $J = 6.6$  Hz, 2H), 1.85–1.67 (m, 15H), 1.54 (m, 4H), 1.09–0.93 (m, 23H), 0.81 (m, 7H). The  $^{13}\text{C}$  NMR spectrum of **H** is shown in Fig. S2.  $^{13}\text{C}$  NMR ( $\text{CDCl}_3$ , 293 K, 100 MHz)  $\delta$  (ppm): 167.01, 150.55, 149.81, 149.21, 148.94, 148.85, 148.81, 148.70, 146.68, 143.00, 128.35, 127.63, 127.56, 127.35, 127.01, 126.57, 126.49, 115.28, 114.99, 114.01, 113.85, 113.74, 113.33, 112.66, 69.28, 69.20, 68.99, 68.89, 68.02, 29.16, 28.60, 28.35, 22.04, 21.96, 21.82, 21.77, 21.58, 9.78, 9.76, 9.74, 9.71, 9.68, 9.58, 9.52. LRESIMS is shown in Fig. S3:  $m/z$  1123.5  $[\text{M} + \text{H}]^+$  (100%). HRESIMS:  $m/z$  calcd. for  $[\text{M} + \text{H}]^+$   $\text{C}_{69}\text{H}_{91}\text{N}_2\text{O}_{11}$ , 1123.6623; found 1123.6628; error 0.4 ppm.

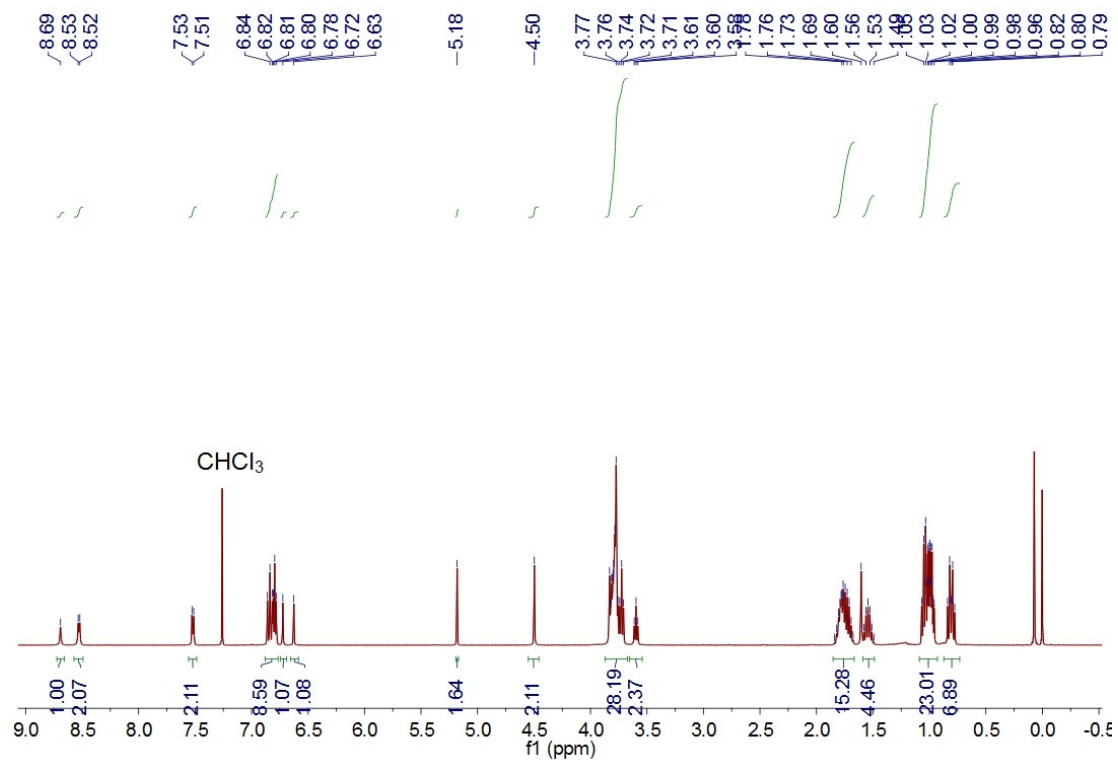

**Figure S1.** <sup>1</sup>H NMR spectrum (CDCl<sub>3</sub>, 293 K, 400 MHz) of **H**.

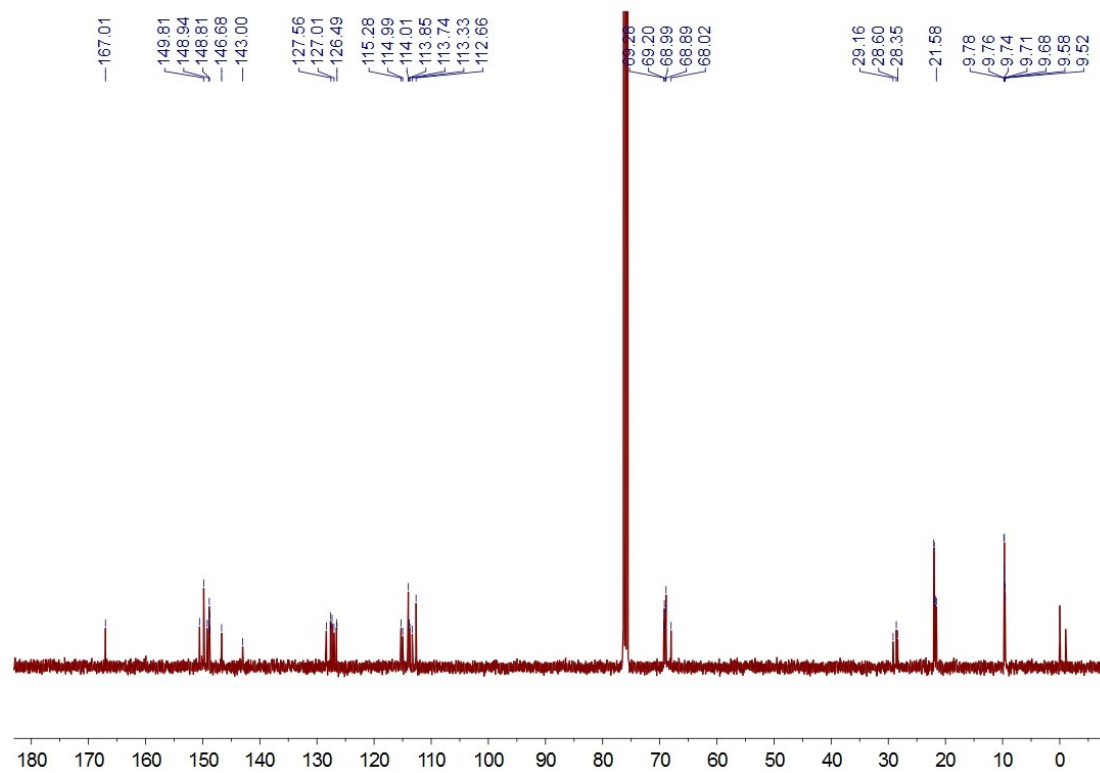

**Figure S2.** <sup>13</sup>C NMR spectrum (CDCl<sub>3</sub>, 293 K, 100 MHz) of **H**.

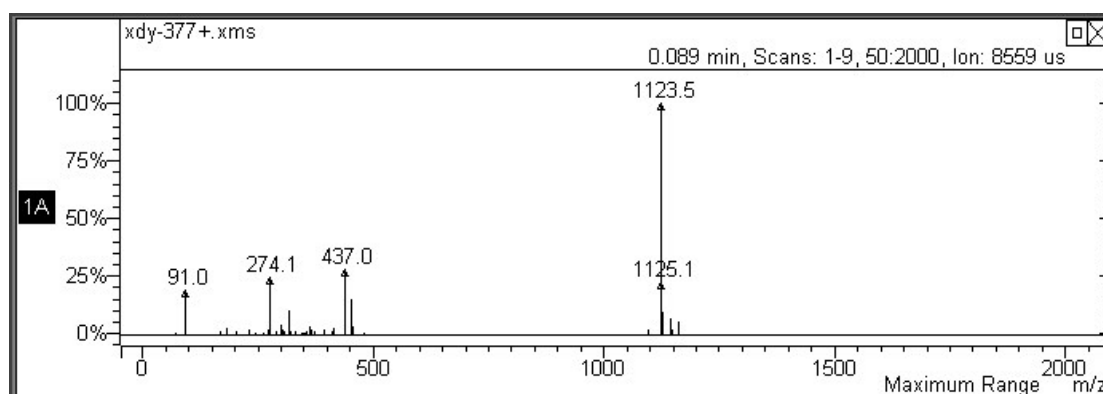

**Figure S3.** Electrospray ionization mass spectrum of **H**. Main peak:  $m/z$  1123.5  $[M + H]^+$  (100%).

## 2.2. Synthesis of **G**

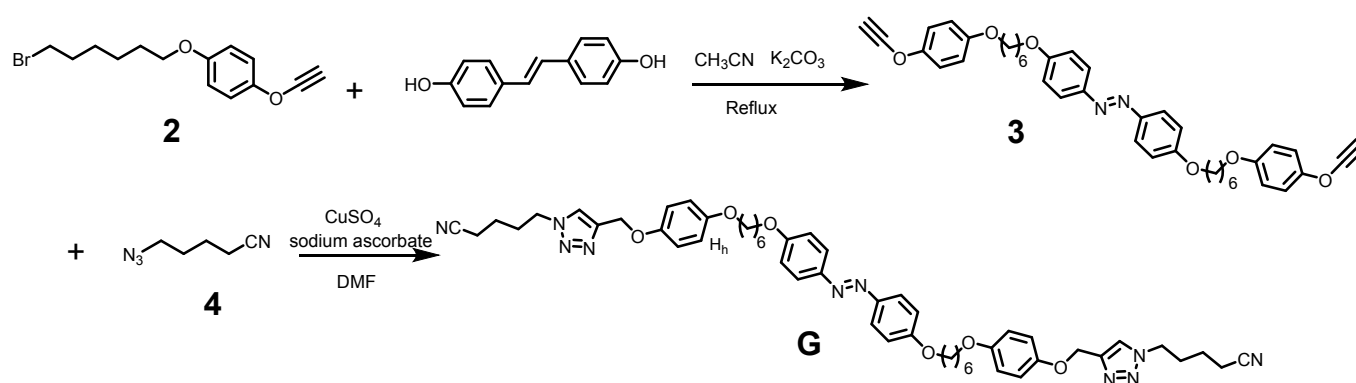

**Scheme S2** Synthetic route to **G**.

Synthesis of **3**. A solution of **3** (10.0 g, 33.6 mmol), 4,4'-azobis(phenol) (2.38 g, 11.2 mmol) and potassium carbonate (4.64 g, 33.6 mmol) in acetonitrile (100 mL) was refluxed for 24 h. Then the solution was filtered and the filtrate was concentrated to give a crude product, which was purified by flash column chromatography (petroleum ether/dichloromethane, 3:1 v/v) to afford **3** as a pale yellow solid (6.72 g, 89%). Mp: 97.9–98.2°C. The  $^1\text{H}$  NMR spectrum of **3** is shown in Fig. S4.  $^1\text{H}$  NMR (400 MHz,  $\text{CDCl}_3$ )  $\delta$  8.31–8.09 (m, 4H), 7.03–6.87 (m, 8H), 6.90–6.77 (m, 4H), 4.64 (d,  $J = 2.4$  Hz, 4H), 4.06 (t,  $J = 6.4$  Hz, 4H), 3.93 (t,  $J = 6.4$  Hz, 4H), 2.50 (t,  $J = 2.4$  Hz, 2H), 1.91–1.75 (m, 8H), 1.56–1.52 (m, 8H). The  $^{13}\text{C}$  NMR spectrum of **3** is shown in Fig. S5.  $^{13}\text{C}$  NMR ( $\text{CDCl}_3$ , 293 K, 100 MHz)  $\delta$  (ppm): 125.94, 116.13, 115.30, 114.40, 75.29, 68.71, 68.27, 56.61, 29.26, 28.93, 25.84, 25.75. LRESIMS is shown in Fig. S6:  $m/z$  437.1  $[M + 2H + 11\text{H}_2\text{O}]^{2+}$  (100%). HRESIMS:  $m/z$  calcd. for  $[M + H]^+$   $\text{C}_{42}\text{H}_{49}\text{N}_2\text{O}_6$ , 676.3512; found 676.3518; error 0.9 ppm.

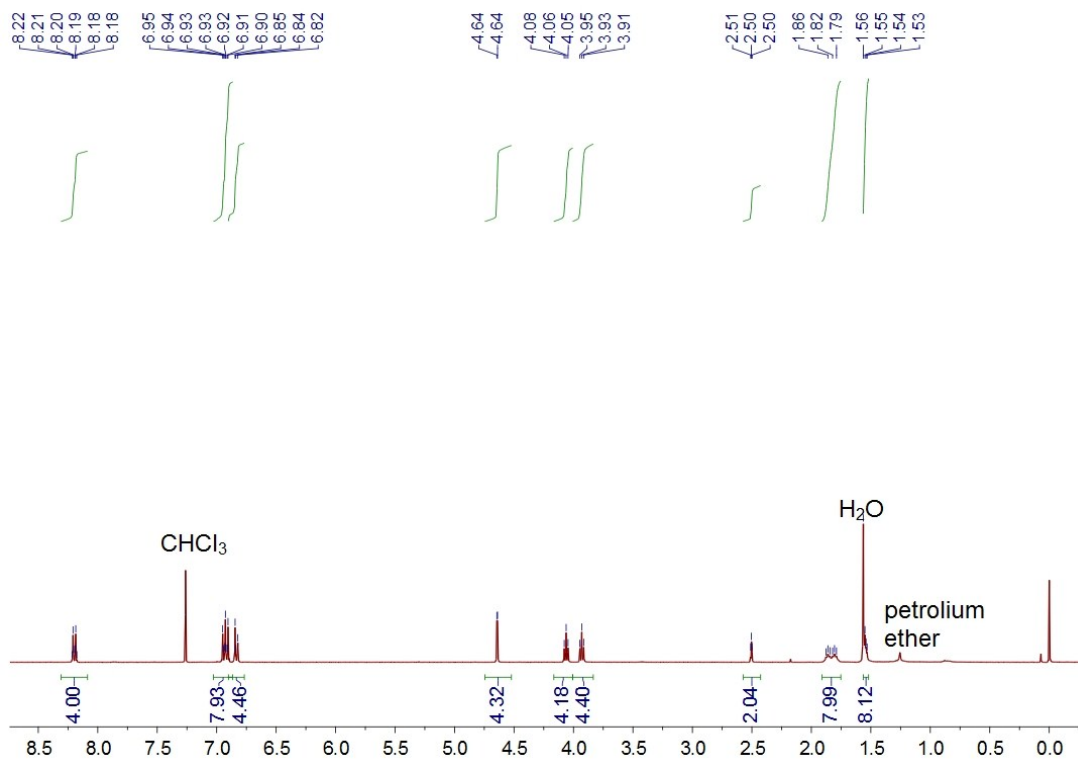

**Figure S4.** <sup>1</sup>H NMR spectrum (CDCl<sub>3</sub>, 293 K, 400 MHz) of **3**.

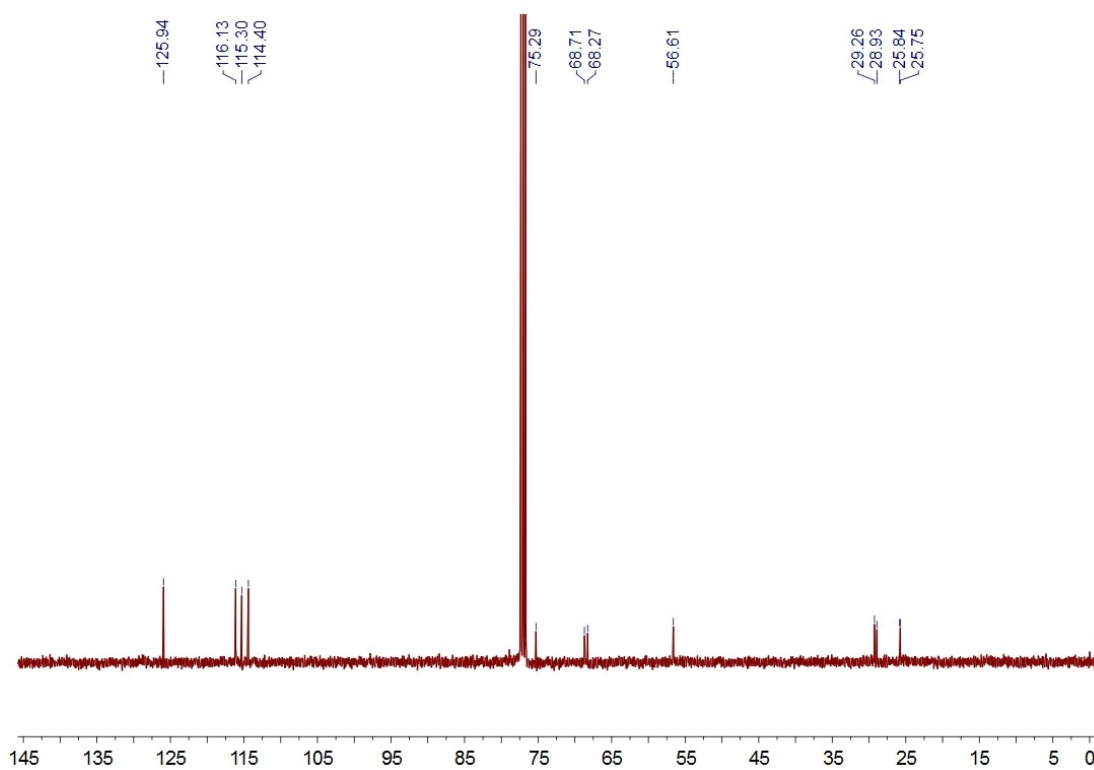

**Figure S5.** <sup>13</sup>C NMR spectrum (CDCl<sub>3</sub>, 293 K, 100 MHz) of **3**.

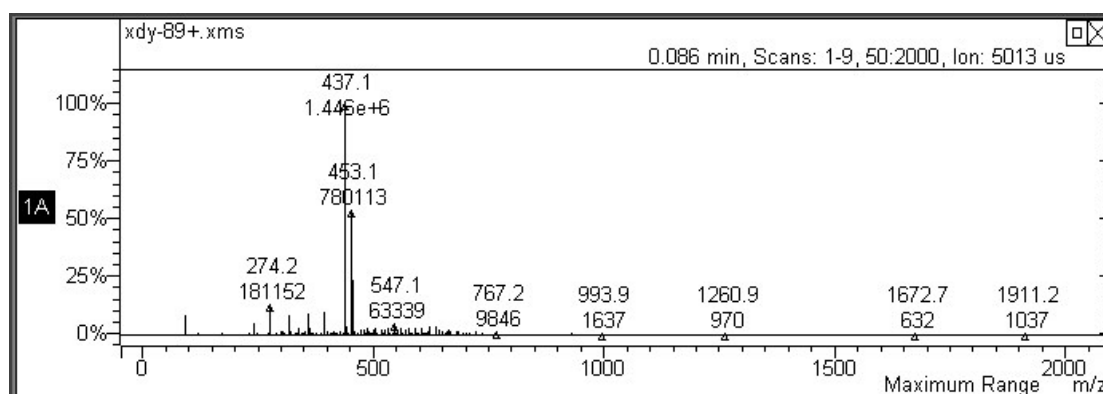

**Figure S6.** Electrospray ionization mass spectrum of **3**.

Main peak:  $m/z$  437.1  $[M + 2H + 11H_2O]^{2+}$  (100%).

Synthesis of **G**. A solution of **3** (3.00 g, 4.45 mmol) and **4** (1.10 g, 9.50 mmol) in DMF (80 mL) in the presence of  $CuSO_4 \cdot 5H_2O$  (0.250 g, 1.00 mmol) with sodium ascorbate (0.500 g, 2.50 mmol) was stirred at 50 °C for 24 h. The reaction mixture was concentrated and recrystallized to afford compound **G** as a pale yellow solid (2.67 g, 65%). Mp: 84.0–85.2°C. The  $^1H$  NMR spectrum of **G** is shown in Fig. S7.  $^1H$  NMR (400 MHz,  $CDCl_3$ )  $\delta$  8.19 (d,  $J = 8.8$  Hz, 4H), 7.61 (s, 2H), 6.92 (t,  $J = 9.0$  Hz, 8H), 6.82 (d,  $J = 4.6$  Hz, 4H), 5.16 (s, 4H), 4.43 (t,  $J = 6.8$  Hz, 4H), 4.06 (t,  $J = 6.4$  Hz, 4H), 3.92 (t,  $J = 6.4$  Hz, 4H), 2.41 (t,  $J = 6.8$  Hz, 2H), 2.17–2.02 (m, 4H), 1.91–1.75 (m, 8H), 1.69 (m, 4H), 1.55 (m, 8H). The  $^{13}C$  NMR spectrum of **G** is shown in Fig. S8.  $^{13}C$  NMR ( $CDCl_3$ , 293 K, 100 MHz)  $\delta$  (ppm): 164.19, 153.68, 152.26, 125.93, 115.84, 115.39, 114.40, 68.69, 68.28, 62.73, 49.25, 29.25, 29.05, 28.91, 25.81, 25.72, 22.33, 16.71. LRESIMS is shown in Fig. S9:  $m/z$  516.1  $[M + 2H + 6H_2O]^{2+}$  (100%). HRESIMS:  $m/z$  calcd. for  $[M + H]^+ C_{52}H_{63}N_{10}O_6$ , 923.4932; found 923.4918; error  $-2$  ppm.

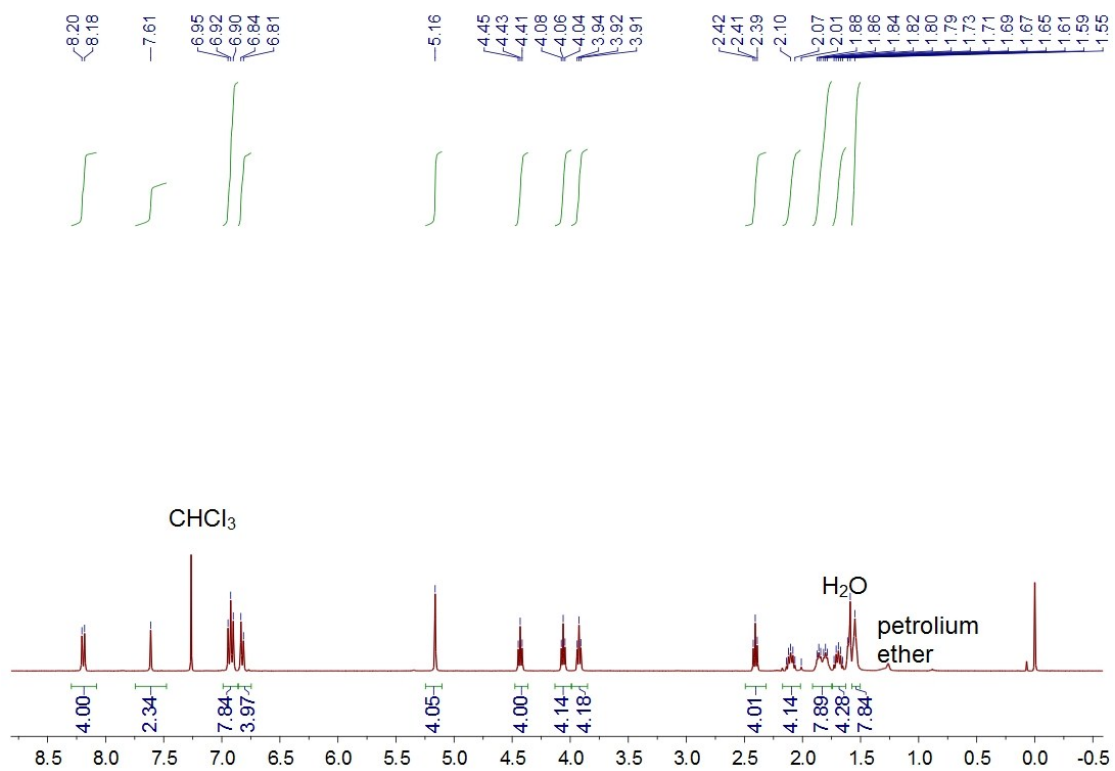

**Figure S7.** <sup>1</sup>H NMR spectrum (CDCl<sub>3</sub>, 293 K, 400 MHz) of **G**.

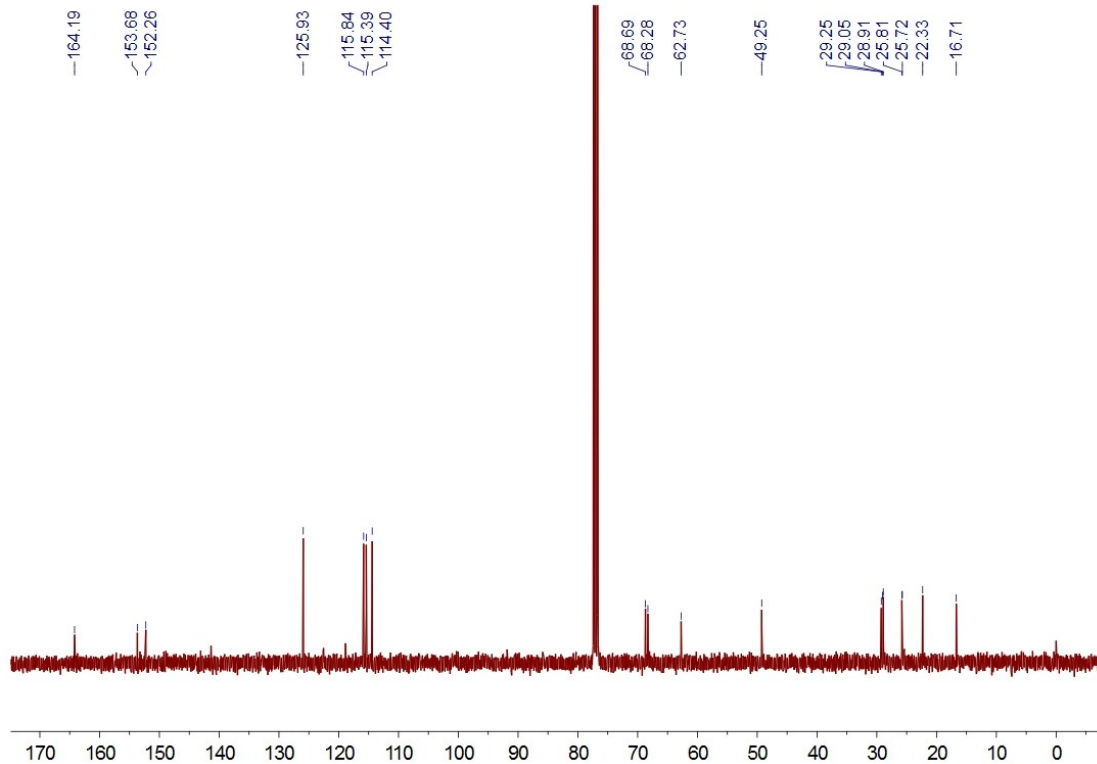

**Figure S8.** <sup>13</sup>C NMR spectrum (CDCl<sub>3</sub>, 293 K, 100 MHz) of **G**.



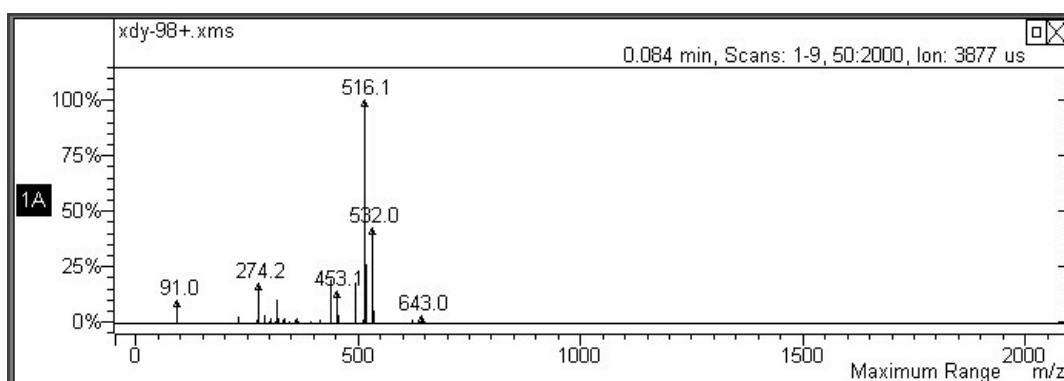

**Figure S9.** Electrospray ionization mass spectrum of **G**.

Main peak:  $m/z$  516.1  $[M + 2H + 6H_2O]^{2+}$  (100%).

3. Partial  $^1H$  NMR spectra of the formation of the pillar[5]arene-based dimer and host-guest interaction between the dimer and **G**

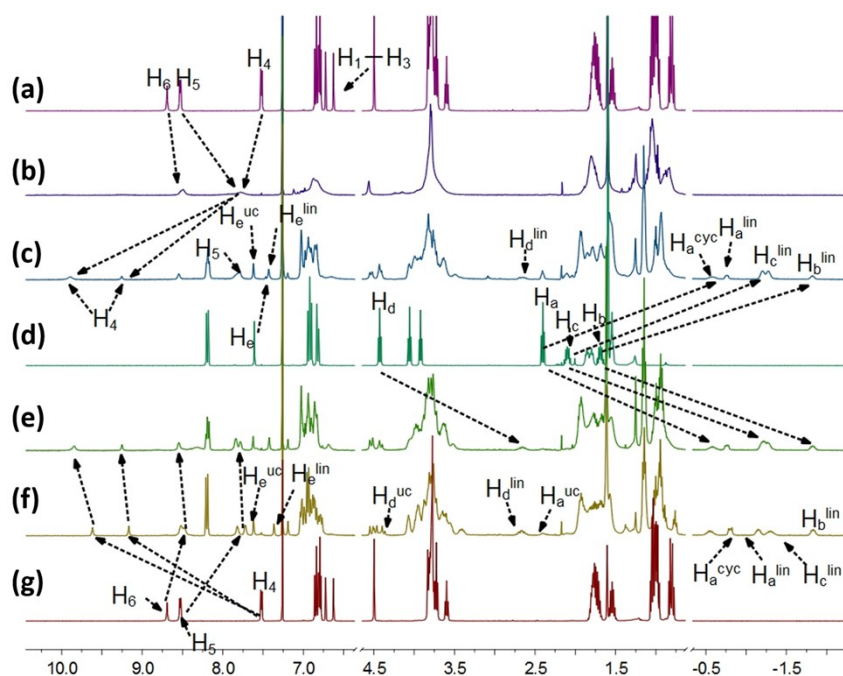

**Figure S10** Partial  $^1H$  NMR spectra ( $CDCl_3$ , 293 K, 500 MHz): (a) **H** (20.0 mM); (b) **H** (20.0 mM) +  $Ag^+$  (10.0 mM); (c) **H** (20.0 mM) +  $Ag^+$  (10.0 mM) + **G** (10.0 mM); (d) **G** (10 mM); (e) **H** (20.0 mM) + **G** (10.0 mM) +  $Ag^+$  (10.0 mM); (f) **H** (20.0 mM) + **G** (10.0 mM); (g) **H** (20.0 mM).

#### 4. DLS results

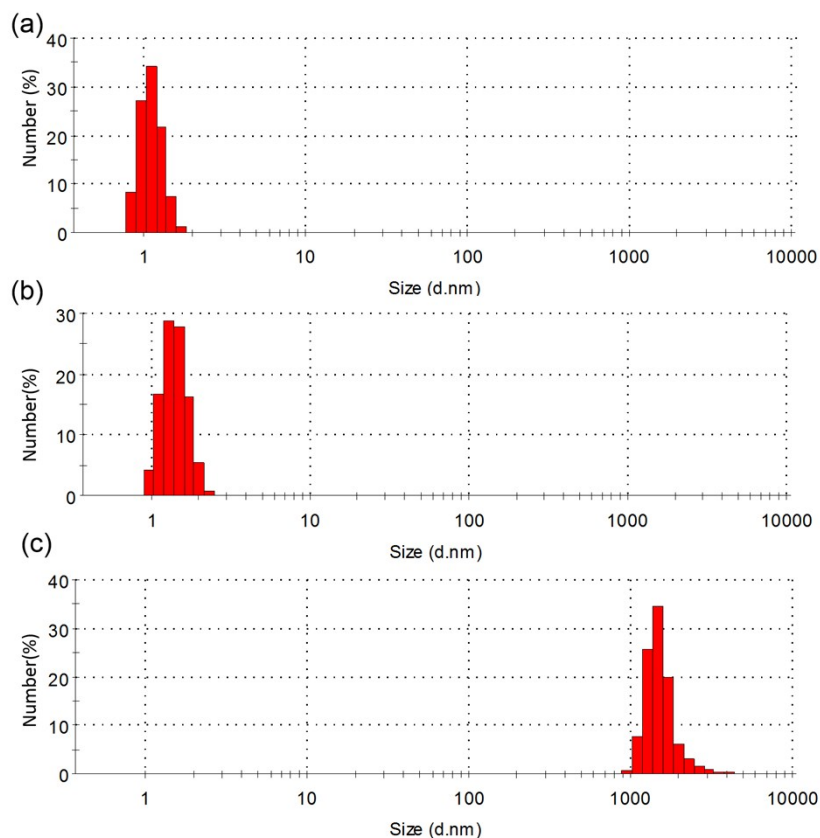

**Figure S11** DLS results of (a) **G** (30.0 mM); (b) pillararene-based dimer (30.0 mM); (c) pillararene-based dimer and **G** (30.0 mM for both).

#### 5. Reversible stimuli-responsive supramolecular polymer to monomers transformation investigated by viscosity measurements

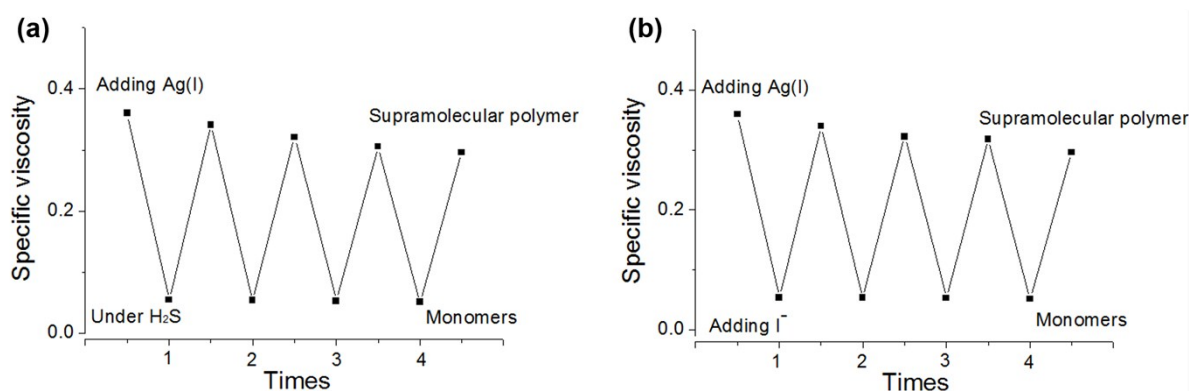

**Figure S12** Reversible stimuli-responsive supramolecular polymer to monomers transformation: (a) H<sub>2</sub>S-responsive transformation, (b) I<sup>-</sup>-responsive transformation.

6. AFM image of the fibers drawn from the supramolecular polymer

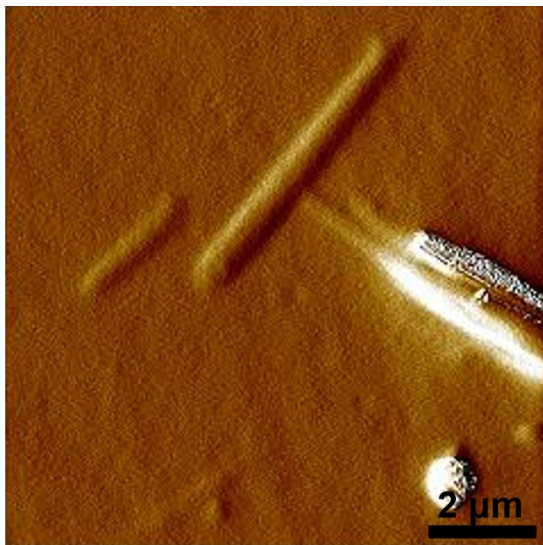

**Figure S13** AFM image of fibers drawn from a high concentration solution of equimolar mixtures of pillararene-based dimer and **G**.

*References:*

- S1. B. Xia, B. Zheng, C. Han, S. Dong, M. Zhang, B. Hu, Y. Yu and F. Huang, *Polym. Chem.*, 2013, **4**, 2019–2024.
- S2. K. Wang, C.-Y. Wang, Y. Zhang, S. X.-A. Zhang, B. Yang and Y.-W. Yang, *Chem. Commun.*, 2014, **50**, 9458–9461.
- S3. Wang, H. Deng, J. Li, K. Zheng, X. Jia and C. Li, *Macromol. Rapid. Commun.* 2013, **34**, 1856–1862.
- Q. Liu, Y. Wang, W. Li and L. Wu, *Langmuir*, 2007, **23**, 8217–8223.
